# Supplementary material
Source: PubMed Central journal article supplement (PMC3610816)
Supplement: NIHMS410923-supplement-01.pdf [file NIHMS410923-supplement-01.pdf]

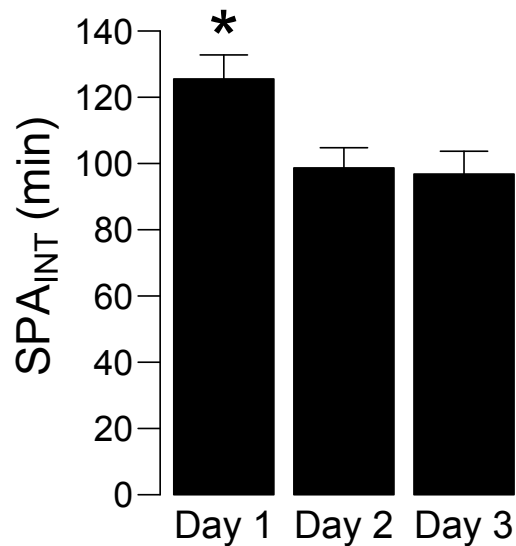

**Supplementary Figure 1. Adaptation to the spontaneous physical activity (SPA) chamber for 24 h recording of intrinsic SPA (SPA<sub>INT</sub>) in Sprague-Dawley rats.** SPA<sub>INT</sub> for three consecutive 24 h periods was measured in Sprague-Dawley rats (n = 8). A repeated measures ANOVA shows there is a significant effect of day ( $F_{2,14} = 19.32$ ,  $P = 0.001$ ), but pairwise analyses show higher SPA<sub>INT</sub> only during the first 24 h of recording with no differences between 24h SPA<sub>INT</sub> recorded on the second and third day (SPA<sub>INT</sub> day 1 vs. day 2,  $P = 0.0039$ ; SPA<sub>INT</sub> day 1 vs. day 3,  $P = 0.0039$ , SPA<sub>INT</sub> day 2 vs. day 3,  $P = 0.526$ ). These data show that, under our experimental conditions, 24 h adaptation is sufficient for SPA<sub>INT</sub> behavioral measures.

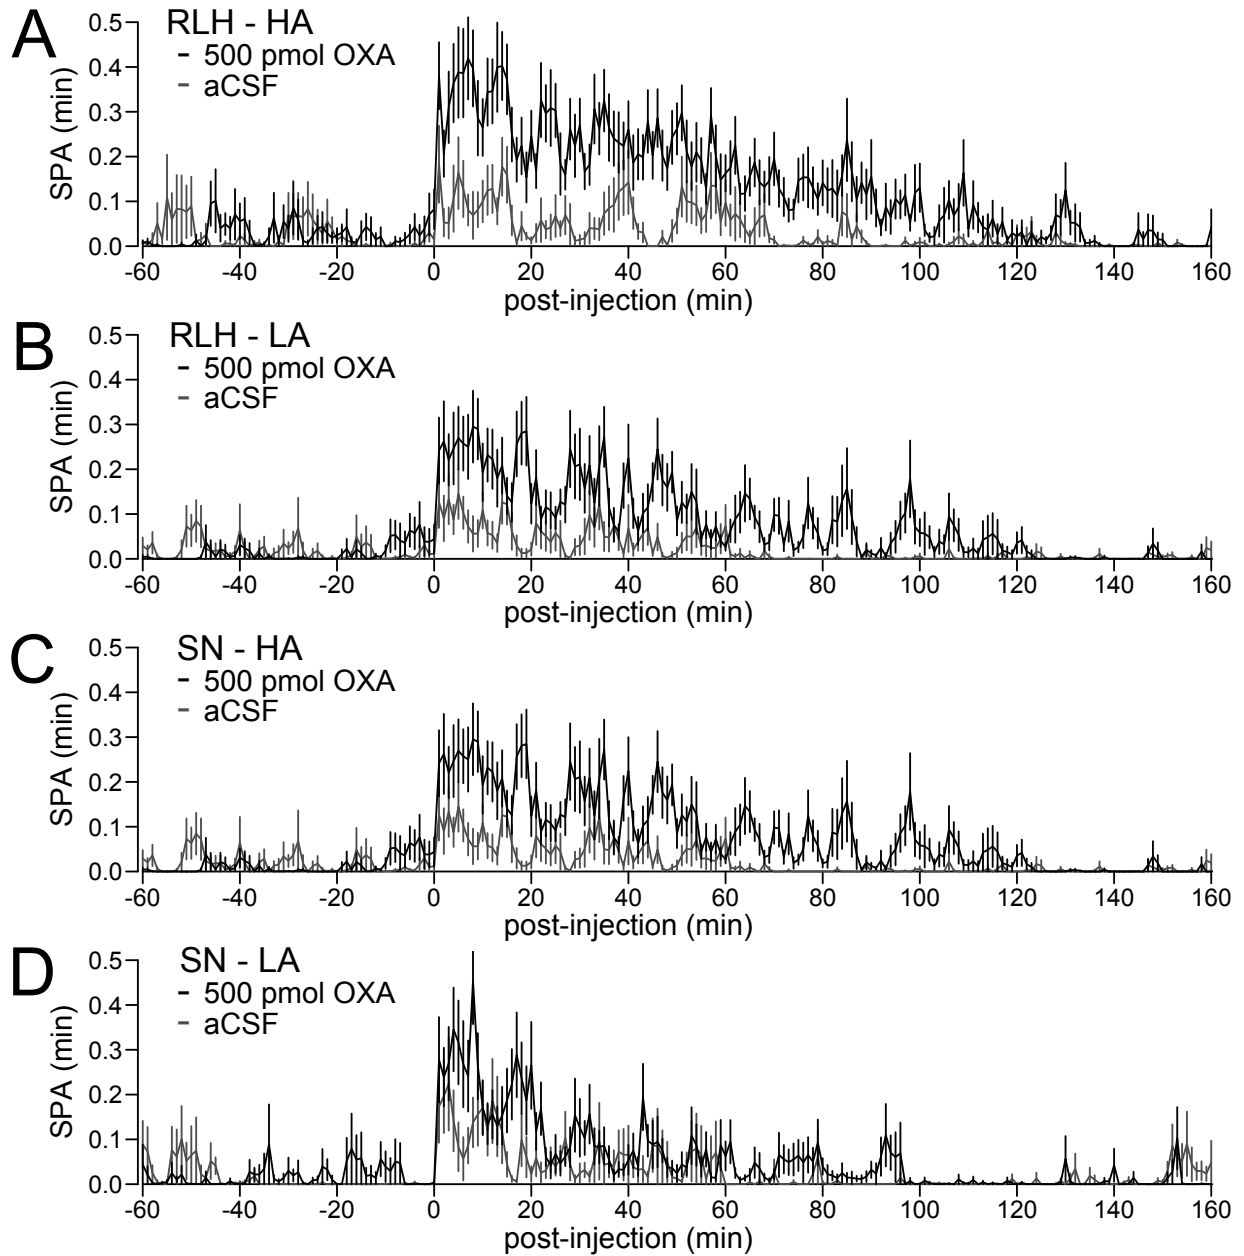

**Supplementary Figure 2. Time-course of ambulatory spontaneous physical activity (SPA) before and after orexin-A (OXA) injections.** Time course of ambulatory SPA before and after injection of either aCSF (vehicle) or 500 pmol OXA in either (A, B) rostral lateral hypothalamus (RLH) or (C, D) substantial nigra pars compacta (SN) from high activity (HA) and low activity (LA) rats. Note return of activity to baseline 2 h after orexin-A injection. Data is shown in summary form in Figure 2 from main text. Y-axis, mean  $\pm$  sem.

**Supplementary Table 1A. Effect of selection criteria on body weight comparisons between high activity (HA) and low activity (LA) rats**

| SPA $\geq$<br>(min / 24 h) | HA                                 | SPA $\leq$<br>(min / 24 h) | LA                                 | t     | df      | p-value |
|----------------------------|------------------------------------|----------------------------|------------------------------------|-------|---------|---------|
|                            | Body Weight<br>(g, mean $\pm$ SEM) |                            | Body Weight<br>(g, mean $\pm$ SEM) |       |         |         |
| 100                        | 289.052 $\pm$ 3.64                 | 60                         | 282.5 $\pm$ 9.176                  | 0.664 | 12.027  | 0.519   |
|                            |                                    | 70                         | 285.786 $\pm$ 7.418                | 0.395 | 19.858  | 0.697   |
|                            |                                    | 80                         | 285.56 $\pm$ 5.968                 | 0.5   | 43.655  | 0.62    |
|                            |                                    | 90                         | 282.256 $\pm$ 5.35                 | 1.05  | 74.904  | 0.297   |
|                            |                                    | 100                        | 283.068 $\pm$ 4.73                 | 1.003 | 121.118 | 0.318   |
| 110                        | 287.775 $\pm$ 4.758                | 60                         | 282.5 $\pm$ 9.176                  | 0.51  | 14.356  | 0.618   |
|                            |                                    | 70                         | 285.786 $\pm$ 7.418                | 0.226 | 25.107  | 0.823   |
|                            |                                    | 80                         | 285.56 $\pm$ 5.968                 | 0.29  | 56.391  | 0.773   |
|                            |                                    | 90                         | 282.256 $\pm$ 5.35                 | 0.771 | 90.976  | 0.443   |
|                            |                                    | 100                        | 283.068 $\pm$ 4.73                 | 0.702 | 127.011 | 0.484   |
| 120                        | 291.804 $\pm$ 5.201                | 60                         | 282.5 $\pm$ 9.176                  | 0.882 | 15.45   | 0.391   |
|                            |                                    | 70                         | 285.786 $\pm$ 7.418                | 0.664 | 27.36   | 0.512   |
|                            |                                    | 80                         | 285.56 $\pm$ 5.968                 | 0.789 | 59.356  | 0.433   |
|                            |                                    | 90                         | 282.256 $\pm$ 5.35                 | 1.28  | 88.899  | 0.204   |
|                            |                                    | 100                        | 283.068 $\pm$ 4.73                 | 1.243 | 111.364 | 0.217   |
| 130                        | 291.095 $\pm$ 6.079                | 60                         | 282.5 $\pm$ 9.176                  | 0.781 | 17.878  | 0.445   |
|                            |                                    | 70                         | 285.786 $\pm$ 7.418                | 0.554 | 31.783  | 0.584   |
|                            |                                    | 80                         | 285.56 $\pm$ 5.968                 | 0.65  | 61.124  | 0.518   |
|                            |                                    | 90                         | 282.256 $\pm$ 5.35                 | 1.091 | 78.377  | 0.278   |
|                            |                                    | 100                        | 283.068 $\pm$ 4.73                 | 1.042 | 83.921  | 0.3     |
| 140                        | 289.091 $\pm$ 7.482                | 60                         | 282.5 $\pm$ 9.176                  | 0.557 | 22.188  | 0.583   |
|                            |                                    | 70                         | 285.786 $\pm$ 7.418                | 0.314 | 37.248  | 0.755   |
|                            |                                    | 80                         | 285.56 $\pm$ 5.968                 | 0.369 | 55.641  | 0.714   |
|                            |                                    | 90                         | 282.256 $\pm$ 5.35                 | 0.743 | 59.902  | 0.46    |
|                            |                                    | 100                        | 283.068 $\pm$ 4.73                 | 0.68  | 57.608  | 0.499   |
| 150                        | 294 $\pm$ 9.134                    | 60                         | 282.5 $\pm$ 9.176                  | 0.888 | 25.448  | 0.383   |
|                            |                                    | 70                         | 285.786 $\pm$ 7.418                | 0.698 | 34.899  | 0.49    |
|                            |                                    | 80                         | 285.56 $\pm$ 5.968                 | 0.774 | 38.382  | 0.444   |
|                            |                                    | 90                         | 282.256 $\pm$ 5.35                 | 1.109 | 37.156  | 0.274   |
|                            |                                    | 100                        | 283.068 $\pm$ 4.73                 | 1.063 | 34.442  | 0.295   |
| 160                        | 297.889 $\pm$ 10.263               | 60                         | 282.5 $\pm$ 9.176                  | 1.118 | 24.939  | 0.274   |
|                            |                                    | 70                         | 285.786 $\pm$ 7.418                | 0.956 | 29.038  | 0.347   |
|                            |                                    | 80                         | 285.56 $\pm$ 5.968                 | 1.038 | 28.16   | 0.308   |
|                            |                                    | 90                         | 282.256 $\pm$ 5.35                 | 1.351 | 26.617  | 0.188   |
|                            |                                    | 100                        | 283.068 $\pm$ 4.73                 | 1.312 | 24.663  | 0.202   |
| 170                        | 304.636 $\pm$ 12.288               | 60                         | 282.5 $\pm$ 9.176                  | 1.443 | 18.032  | 0.166   |
|                            |                                    | 70                         | 285.786 $\pm$ 7.418                | 1.313 | 16.89   | 0.207   |
|                            |                                    | 80                         | 285.56 $\pm$ 5.968                 | 1.396 | 14.928  | 0.183   |
|                            |                                    | 90                         | 282.256 $\pm$ 5.35                 | 1.67  | 14.018  | 0.117   |
|                            |                                    | 100                        | 283.068 $\pm$ 4.73                 | 1.638 | 13.133  | 0.125   |

**Supplementary Table 1B. Effect of selection criteria on fat mass comparisons between high activity (HA) and low activity (LA) rats.**

| HA                         |                                 | LA                         |                                 | t      | df      | p-value |
|----------------------------|---------------------------------|----------------------------|---------------------------------|--------|---------|---------|
| SPA $\geq$<br>(min / 24 h) | Fat Mass<br>(g, mean $\pm$ SEM) | SPA $\leq$<br>(min / 24 h) | Fat Mass<br>(g, mean $\pm$ SEM) |        |         |         |
| 100                        | 28.498 $\pm$ 0.47               | 60                         | 27.564 $\pm$ 1.701              | 0.529  | 10.421  | 0.608   |
|                            |                                 | 70                         | 28.892 $\pm$ 1.509              | -0.249 | 15.624  | 0.806   |
|                            |                                 | 80                         | 28.824 $\pm$ 1.081              | -0.277 | 33.615  | 0.784   |
|                            |                                 | 90                         | 28.49 $\pm$ 0.799               | 0.008  | 65.682  | 0.993   |
|                            |                                 | 100                        | 28.85 $\pm$ 0.676               | -0.428 | 111.479 | 0.67    |
| 110                        | 28.553 $\pm$ 0.574              | 60                         | 27.564 $\pm$ 1.701              | 0.551  | 11.147  | 0.593   |
|                            |                                 | 70                         | 28.892 $\pm$ 1.509              | -0.21  | 16.968  | 0.836   |
|                            |                                 | 80                         | 28.824 $\pm$ 1.081              | -0.222 | 38.38   | 0.826   |
|                            |                                 | 90                         | 28.49 $\pm$ 0.799               | 0.064  | 76.325  | 0.949   |
|                            |                                 | 100                        | 28.85 $\pm$ 0.676               | -0.335 | 120.027 | 0.738   |
| 120                        | 29.004 $\pm$ 0.585              | 60                         | 27.564 $\pm$ 1.701              | 0.801  | 11.227  | 0.44    |
|                            |                                 | 70                         | 28.892 $\pm$ 1.509              | 0.069  | 17.107  | 0.945   |
|                            |                                 | 80                         | 28.824 $\pm$ 1.081              | 0.146  | 38.642  | 0.884   |
|                            |                                 | 90                         | 28.49 $\pm$ 0.799               | 0.519  | 74.799  | 0.605   |
|                            |                                 | 100                        | 28.85 $\pm$ 0.676               | 0.172  | 111.444 | 0.864   |
| 130                        | 28.607 $\pm$ 0.694              | 60                         | 27.564 $\pm$ 1.701              | 0.568  | 12.173  | 0.58    |
|                            |                                 | 70                         | 28.892 $\pm$ 1.509              | -0.171 | 18.817  | 0.866   |
|                            |                                 | 80                         | 28.824 $\pm$ 1.081              | -0.169 | 43.522  | 0.867   |
|                            |                                 | 90                         | 28.49 $\pm$ 0.799               | 0.111  | 76.584  | 0.912   |
|                            |                                 | 100                        | 28.85 $\pm$ 0.676               | -0.251 | 95.176  | 0.803   |
| 140                        | 28.006 $\pm$ 0.78               | 60                         | 27.564 $\pm$ 1.701              | 0.236  | 13.021  | 0.817   |
|                            |                                 | 70                         | 28.892 $\pm$ 1.509              | -0.521 | 20.288  | 0.608   |
|                            |                                 | 80                         | 28.824 $\pm$ 1.081              | -0.613 | 46.107  | 0.543   |
|                            |                                 | 90                         | 28.49 $\pm$ 0.799               | -0.433 | 69.73   | 0.666   |
|                            |                                 | 100                        | 28.85 $\pm$ 0.676               | -0.817 | 74.868  | 0.416   |
| 150                        | 28.444 $\pm$ 1.027              | 60                         | 27.564 $\pm$ 1.701              | 0.443  | 15.89   | 0.664   |
|                            |                                 | 70                         | 28.892 $\pm$ 1.509              | -0.245 | 24.698  | 0.808   |
|                            |                                 | 80                         | 28.824 $\pm$ 1.081              | -0.255 | 45.997  | 0.8     |
|                            |                                 | 90                         | 28.49 $\pm$ 0.799               | -0.035 | 46.77   | 0.972   |
|                            |                                 | 100                        | 28.85 $\pm$ 0.676               | -0.33  | 42.226  | 0.743   |
| 160                        | 29.022 $\pm$ 1.082              | 60                         | 27.564 $\pm$ 1.701              | 0.723  | 16.339  | 0.48    |
|                            |                                 | 70                         | 28.892 $\pm$ 1.509              | 0.07   | 24.792  | 0.944   |
|                            |                                 | 80                         | 28.824 $\pm$ 1.081              | 0.129  | 39.799  | 0.898   |
|                            |                                 | 90                         | 28.49 $\pm$ 0.799               | 0.396  | 35.822  | 0.695   |
|                            |                                 | 100                        | 28.85 $\pm$ 0.676               | 0.135  | 31.48   | 0.894   |
| 170                        | 29.226 $\pm$ 1.39               | 60                         | 27.564 $\pm$ 1.701              | 0.757  | 17.864  | 0.459   |
|                            |                                 | 70                         | 28.892 $\pm$ 1.509              | 0.163  | 22.945  | 0.872   |
|                            |                                 | 80                         | 28.824 $\pm$ 1.081              | 0.228  | 22.358  | 0.822   |
|                            |                                 | 90                         | 28.49 $\pm$ 0.799               | 0.459  | 17.202  | 0.652   |
|                            |                                 | 100                        | 28.85 $\pm$ 0.676               | 0.243  | 15.151  | 0.811   |

**Supplementary Table 1C. Effect of selection criteria on lean mass comparisons between high activity (HA) and low activity (LA) rats.**

|     | HA                         |                                  | LA                         |                                  | t       | df    | p-value |
|-----|----------------------------|----------------------------------|----------------------------|----------------------------------|---------|-------|---------|
|     | SPA $\geq$<br>(min / 24 h) | Lean Mass<br>(g, mean $\pm$ SEM) | SPA $\leq$<br>(min / 24 h) | Lean Mass<br>(g, mean $\pm$ SEM) |         |       |         |
| 100 | 232.645 $\pm$ 2.859        | 60                               | 228.691 $\pm$ 6.558        | 0.553                            | 12.701  | 0.59  |         |
|     |                            | 70                               | 231.01 $\pm$ 5.294         | 0.272                            | 21.435  | 0.788 |         |
|     |                            | 80                               | 230.096 $\pm$ 4.121        | 0.508                            | 49.717  | 0.614 |         |
|     |                            | 90                               | 228.232 $\pm$ 3.866        | 0.918                            | 81.114  | 0.361 |         |
|     |                            | 100                              | 228.165 $\pm$ 3.5          | 0.991                            | 126.46  | 0.323 |         |
| 110 | 231.847 $\pm$ 3.692        | 60                               | 228.691 $\pm$ 6.558        | 0.419                            | 15.41   | 0.681 |         |
|     |                            | 70                               | 231.01 $\pm$ 5.294         | 0.13                             | 27.515  | 0.898 |         |
|     |                            | 80                               | 230.096 $\pm$ 4.121        | 0.316                            | 63.884  | 0.753 |         |
|     |                            | 90                               | 228.232 $\pm$ 3.866        | 0.676                            | 95.712  | 0.501 |         |
|     |                            | 100                              | 228.165 $\pm$ 3.5          | 0.724                            | 127.789 | 0.471 |         |
| 120 | 235.23 $\pm$ 4.042         | 60                               | 228.691 $\pm$ 6.558        | 0.849                            | 16.741  | 0.408 |         |
|     |                            | 70                               | 231.01 $\pm$ 5.294         | 0.634                            | 30.156  | 0.531 |         |
|     |                            | 80                               | 230.096 $\pm$ 4.121        | 0.889                            | 65.817  | 0.377 |         |
|     |                            | 90                               | 228.232 $\pm$ 3.866        | 1.251                            | 91.198  | 0.214 |         |
|     |                            | 100                              | 228.165 $\pm$ 3.5          | 1.321                            | 109.841 | 0.189 |         |
| 130 | 234.927 $\pm$ 4.701        | 60                               | 228.691 $\pm$ 6.558        | 0.773                            | 19.497  | 0.449 |         |
|     |                            | 70                               | 231.01 $\pm$ 5.294         | 0.553                            | 34.742  | 0.584 |         |
|     |                            | 80                               | 230.096 $\pm$ 4.121        | 0.773                            | 63.833  | 0.442 |         |
|     |                            | 90                               | 228.232 $\pm$ 3.866        | 1.1                              | 77.138  | 0.275 |         |
|     |                            | 100                              | 228.165 $\pm$ 3.5          | 1.154                            | 81.375  | 0.252 |         |
| 140 | 233.208 $\pm$ 5.79         | 60                               | 228.691 $\pm$ 6.558        | 0.516                            | 24.34   | 0.61  |         |
|     |                            | 70                               | 231.01 $\pm$ 5.294         | 0.28                             | 39.656  | 0.781 |         |
|     |                            | 80                               | 230.096 $\pm$ 4.121        | 0.438                            | 54.114  | 0.663 |         |
|     |                            | 90                               | 228.232 $\pm$ 3.866        | 0.715                            | 57.298  | 0.478 |         |
|     |                            | 100                              | 228.165 $\pm$ 3.5          | 0.745                            | 55.566  | 0.459 |         |
| 150 | 237.609 $\pm$ 6.97         | 60                               | 228.691 $\pm$ 6.558        | 0.932                            | 26.818  | 0.36  |         |
|     |                            | 70                               | 231.01 $\pm$ 5.294         | 0.754                            | 34.995  | 0.456 |         |
|     |                            | 80                               | 230.096 $\pm$ 4.121        | 0.928                            | 36.031  | 0.36  |         |
|     |                            | 90                               | 228.232 $\pm$ 3.866        | 1.176                            | 35.662  | 0.247 |         |
|     |                            | 100                              | 228.165 $\pm$ 3.5          | 1.211                            | 33.682  | 0.234 |         |
| 160 | 240.988 $\pm$ 7.873        | 60                               | 228.691 $\pm$ 6.558        | 1.2                              | 25.545  | 0.241 |         |
|     |                            | 70                               | 231.01 $\pm$ 5.294         | 1.052                            | 28.286  | 0.302 |         |
|     |                            | 80                               | 230.096 $\pm$ 4.121        | 1.226                            | 26.197  | 0.231 |         |
|     |                            | 90                               | 228.232 $\pm$ 3.866        | 1.454                            | 25.522  | 0.158 |         |
|     |                            | 100                              | 228.165 $\pm$ 3.5          | 1.488                            | 24.108  | 0.15  |         |
| 170 | 243.818 $\pm$ 9.938        | 60                               | 228.691 $\pm$ 6.558        | 1.27                             | 17.02   | 0.221 |         |
|     |                            | 70                               | 231.01 $\pm$ 5.294         | 1.137                            | 15.518  | 0.273 |         |
|     |                            | 80                               | 230.096 $\pm$ 4.121        | 1.275                            | 13.567  | 0.224 |         |
|     |                            | 90                               | 228.232 $\pm$ 3.866        | 1.462                            | 13.176  | 0.167 |         |
|     |                            | 100                              | 228.165 $\pm$ 3.5          | 1.486                            | 12.601  | 0.162 |         |

**Supplementary Table 1.** Differences in body weight (A), fat mass (B) or lean mass (C) between HA and LA rats selected using different values of ambulatory SPA<sub>INT</sub>. HA and LA rats were defined using increments of 10 minutes over a range of ambulatory SPA<sub>INT</sub> recorded for 24 h. For HA rats, the range was 100 to 170 min. For LA rats, the range was 60 to 100 min. Using these criteria, the minimum number of HA or LA rats in each comparison was 10. Pairwise comparisons were done using a Welch T-test and p-values are shown uncorrected for multiple comparisons. t, t-test statistic, df, degrees of freedom).

| Parameter                         | Phenotype | IDC RECORDING SESSIONS |                |               | $F_{HA/LA}$ | $F_{TIME}$ | $F_{[HA/LA * TIME]}$ |
|-----------------------------------|-----------|------------------------|----------------|---------------|-------------|------------|----------------------|
|                                   |           | 1                      | 2              | 3             |             |            |                      |
| <b>Body Weight (g)</b>            | HA        | 384.85 ± 8.196         | 388.21 ± 7.473 | 389.43 ± 8.04 | 0.057       | 0.081      | 0.989                |
|                                   | LA        | 385.5 ± 11.024         | 389.1 ± 12.418 | 391.5 ± 11.95 |             |            |                      |
| <b>Un-corrected EE (kcal / h)</b> | HA        | 3.2 ± 0.057            | 3.17 ± 0.055   | 3.19 ± 0.055  | 0.795       | 0.992      | 0.996                |
|                                   | LA        | 3.15 ± 0.109           | 3.15 ± 0.122   | 3.16 ± 0.113  |             |            |                      |
| <b>Food Intake (g)</b>            | HA        | 29.17 ± 1.317          | 26.48 ± 1.033  | 26.94 ± 0.486 | 0.366       | 0.237      | 0.873                |
|                                   | LA        | 30.27 ± 1.964          | 29.28 ± 1.570  | 28.57 ± 1.281 |             |            |                      |

**Supplementary Table 2.** Body weight, uncorrected energy expenditure (EE) and food intake (g) in high activity (HA, N = 14) and low activity (LA, N = 10) rats selected based on 24 h ambulatory SPA<sub>INT</sub> recorded in indirect calorimetry (IDC) cages. Values shown are mean ± SEM. Each IDC session correspond to 24 h of recording and sessions were consecutive. Data was analyzed with a 2-way repeated measures ANOVA and no significant differences were detected in any variable. P-values are shown in the last three columns from right to left. Terms of the ANOVA are:  $F_{HA/LA}$ , main effect for differences between HA and LA rats;  $F_{TIME}$ , main effect for differences between IDC recording sessions and  $F_{[HA/LA * TIME]}$  term for interaction between HA/LA phenotype and IDC recording session.

|                      | HA (n = 11)      | LA (n = 7)     | t       | df | p-value |
|----------------------|------------------|----------------|---------|----|---------|
| <b>Fat Mass (g)</b>  | 44.027 ± 2.479   | 47.575 ± 26.39 | -0.911  | 16 | 0.3756  |
| <b>Lean Mass (g)</b> | 287.449 ± 26.394 | 310.67 ± 11.50 | -0.6702 | 16 | 0.5123  |

**Supplementary Table 3.** Fat and lean mass recorded at the end of IDC sessions for a subset of high activity (HA) and low activity (LA) rats selected based on 24 h ambulatory spontaneous physical activity recorded in indirect calorimetry (IDC) cages. Analysis for group differences between HA and LA rats with a t-test did not detect significant differences in either fat or lean mass. Values shown are mean ± SEM. t, t-test statistic, df, degrees of freedom).
